# Supplementary material for: A New Antisense Phosphoryl Guanidine Oligo-2′-O-Methylribonucleotide Penetrates Into Intracellular Mycobacteria and Suppresses Target Gene Expression
Source: PubMed Central journal article supplement (PMC6778816; doi:10.3389/fphar.2019.01049), 2019-09-19
Supplement: Image_2.pdf [file Image_2.pdf]

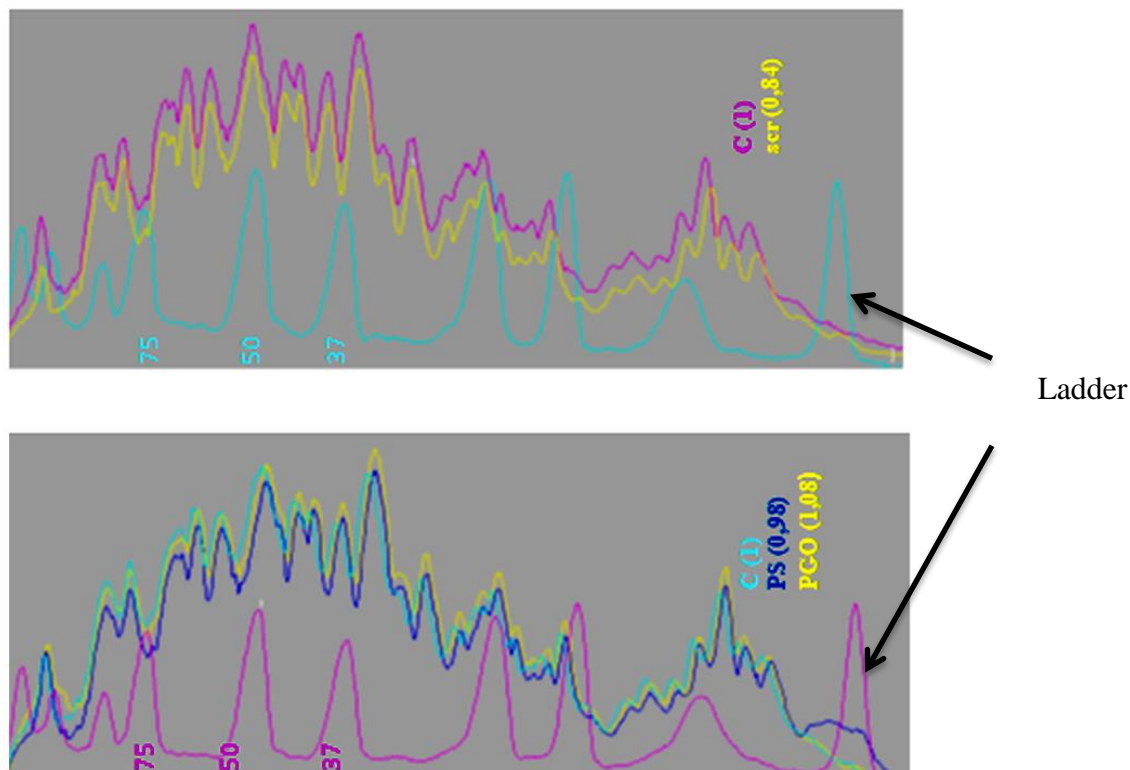

Supplementary Figure 2. Densitometry analysis of an SDS-PAGE gels. The proteins were visualized by Coomassie staining, and analyzed by densitometry using Gel Pro Analysis software. Total protein amount in a lane is given as a relative density unit. The “Ladder” profile stands for Precision Plus Protein™ Dual Color Standards (#1610374, BioRad, USA).
