# Supplementary material for: A New Antisense Phosphoryl Guanidine Oligo-2′-O-Methylribonucleotide Penetrates Into Intracellular Mycobacteria and Suppresses Target Gene Expression
Source: Front Pharmacol. 2019 Sep 19;10:1049. doi: 10.3389/fphar.2019.01049 (PMC6778816; doi:10.3389/fphar.2019.01049)
Supplement: Supplementary file 4 [file Table_1.docx]

**Table 1. Oligonucleotides used in the study**

| **Name** | **Oligonucleotide sequence, 5’–3’***a* | | **Molecular mass** | |
| --- | --- | --- | --- | --- |
| **calcd** | **found** |
| ald-RNA | AGG AGC GAU CAU GCU CGU CGG AA | | – *b* | – *b* |
| ald | ttc cga cga gca tga tcg ctc ct | | – *b* | – *b* |
| ald-OMe | UUC CGA CGA GCA UGA UCG CUC CU | | – *b* | – *b* |
| ald-PS | tS*c*tScS cSgSaS cSgSaS gScSaS tSgSaS tScSgS cStScS cSt | | – *b* | – *b* |
| µ-ald | tµ*d*tµcµ cµgµaµ cµgµaµ gµcµaµ tµgµaµ tµcµgµ cµtµcµ cµt | | 8974.2*e* | 8973.5*e* |
| ald-PGO | U**f*U*C*C*G*A*C*G*A*G*C*A*U*G*A*U*C*G*C*U*C*C*U | | 9691.3 | 9685.7 |
| scr-PGO | G*U*C*C*A*G*C*C*C*C*A*U*G*G*Aр | | 6563.3 | 6563.6 |
| FAM-PGO | U*U*C*C*G*A*C*G*A*G*C*A*U*G*A*U*C*G*C*U*C*C*U-FAM | | 10258.8 | 10255.6 |
|  | | | | |
| **Primers for qPCR** | | | | |
| Ald-smegm-for | | cctaccacctcatgcgcag | | |
| Ald-smegm-rev | | tgaccgcttcttcgagttcg | | |
| 16S-smegm-for | | atgtcggttcccttgtggc | | |
| 16S-smegm-rev | | caagggttgcgctcgttg | | |

*a* Ribonucleotides and 2’-O-methylribonucleotides are in uppercase, ribonucleotides are underlined; deoxynucleotides are in lowercase; *b* Obtained from a commercial supplier; *c* (S) – phosphorothioate linkage; *d* (µ) – mesyl phosphoramidate linkage; *e* Containing 5’-dimethoxytrityl (DMTr) group; *f* (*) – 1,3-dimethylimidazolidine-2-imino group; р – 6-aminohexyl phosphoryl guanidine group; FAM – 6-fluorescein carboxamide residue
